# Supplementary material for: Stability and Oligomerization of Mutated SMN Protein Determine Clinical Severity of Spinal Muscular Atrophy
Source: MDPI journal article supplement (doi:10.3390/genes13020205), 2022-01-24
Supplement: s1 [file s1]

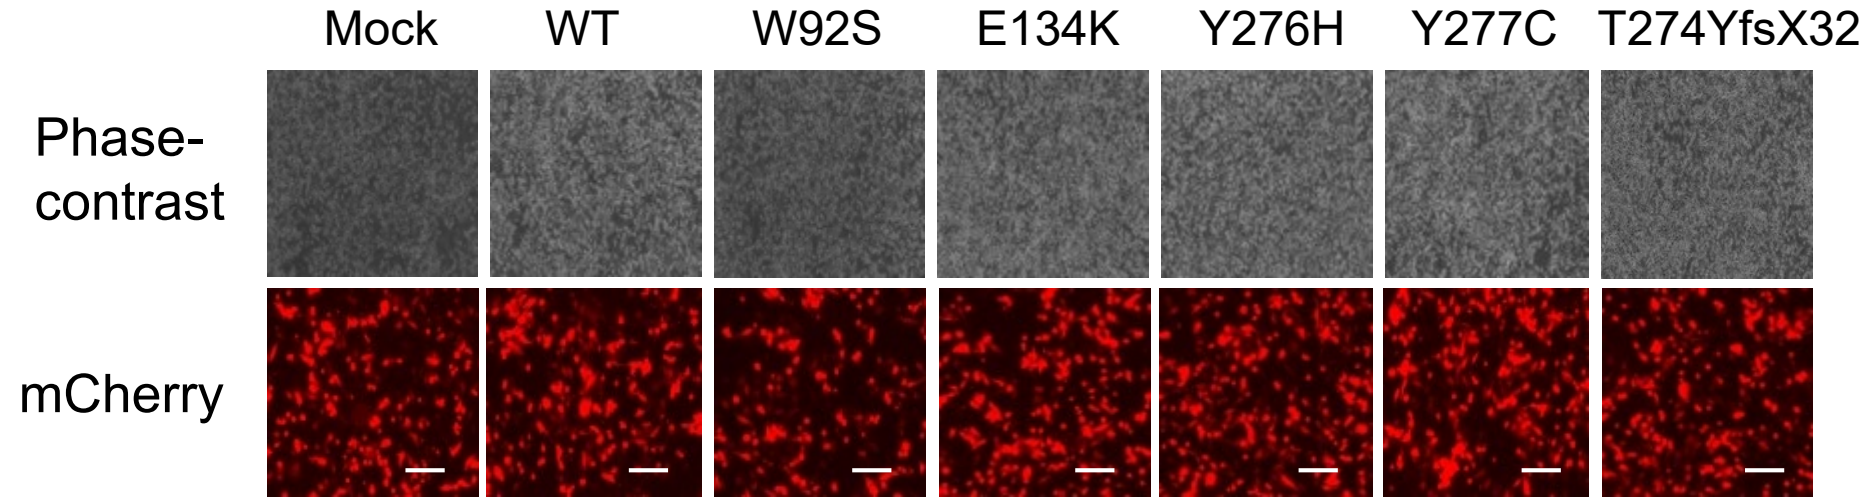

**Figure S1:** Adjustment of transfection efficiency of the plasmid containing *SMN1* cDNA. Red fluorescence signal (mCherry) in HeLa cells transfected with empty vector (Mock), wild-type (WT) and mutant-type SMN cDNA (W92S, E134K, Y276H, Y277C, T274YfsX32) were observed under BZ - X710 fluorescence microscope (Keyence, Osaka, Japan). The white bar indicates 100 $\mu$ M.

**Table S1: SMN protein amounts quantitated by Western blotting analysis and ratios of Exo-SMN/End-SMN**

|                     | WT              | W92S           | E134K          | Y276H          | Y277C           | T274Yfs        |
|---------------------|-----------------|----------------|----------------|----------------|-----------------|----------------|
| Exo-SMN             | 1.084           | 0.469          | 0.545          | 0.646          | 1.066           | 0.241          |
| End-SMN             | 2.163           | 1.963          | 1.931          | 1.864          | 1.698           | 1.902          |
| Exo-SMN<br>/End-SMN | 0.501<br>(100%) | 0.239<br>(48%) | 0.282<br>(56%) | 0.347<br>(69%) | 0.628<br>(125%) | 0.127<br>(25%) |

End-SMN value represents mean amount of endogenous SMN protein.  
Exo-SMN value represents mean amount of exogenous SMN1 protein.  
A ratio of Exo-SMN/End-SMN represents estimated SMN protein stability.

**Table S2: Immunoprecipitated protein amounts quantitated by Western blotting analysis and ratios of End-SMN /Exo-SMN**

|                     | <b>WT</b>       | <b>E134K</b>   | <b>Y276H</b>    | <b>Y277C</b>    | <b>T274Yfs</b> |
|---------------------|-----------------|----------------|-----------------|-----------------|----------------|
| End-SMN             | 5.690           | 4.953          | 3.136           | 6.377           | 0.070          |
| Exo-SMN             | 10.459          | 9.436          | 3.551           | 11.397          | 2.893          |
| End-SMN<br>/Exo-SMN | 0.544<br>(100%) | 0.525<br>(96%) | 0.883<br>(153%) | 0.559<br>(110%) | 0.024<br>(4%)  |

End-SMN value represents mean amount of endogenous SMN protein.  
Exo-SMN value represents mean amount of exogenous SMN1 protein.  
A ratio of End-SMN/Exo-SMN represents estimated oligomerization ability.

# Supplementary information

Notes about clinical phenotype of patients 1 and 2: The W92S and E134K mutation both reside in the exon 3-tudor domain which has been reported to be important in Sm-ring assembly [23]. The patients with W92S mutation in this study, who had 3 *SMN2* copy numbers, showed a more severe phenotype than the patient with E134K mutation who had 2 *SMN2* copies. There may be unknown factors associated with the W92S mutation, which are not affected by the E134K mutation.
